# Supplementary material for: A pomegranate seed-structured nanozyme-based colorimetric immunoassay for highly sensitive and specific biosensing of Staphylococcus aureus
Source: Royal Society of Chemistry journal article supplement (doi:10.1039/d3an01621h), 2023-12-15
Supplement: d3an01621h1.pdf [file d3an01621h1.pdf]

## Supporting information for

### A pomegranate seed-structured nanozyme-based colorimetric immunoassay for highly sensitive and specific biosensing of *Staphylococcus aureus*

Jinghui Li,<sup>‡a,b</sup> Yipeng Tang,<sup>‡a,b</sup> Yunpeng Bai,<sup>b,c</sup> Zhejun Zhang,<sup>b</sup> Shaopeng Zhang,<sup>b</sup> Tongyun Chen,<sup>b,c,\*</sup> Feng Zhao,<sup>a,b,c,\*</sup>, Zhigang Guo,<sup>a,b,c,d,\*</sup>

<sup>a</sup> Clinical School of Thoracic, Tianjin Medical University, Tianjin, 300070, China

<sup>b</sup> Chest hospital, Tianjin University, Tianjin, 300072, China

<sup>c</sup> Tianjin Key Laboratory of Cardiovascular Emergency and Critical Care, Tianjin, 300222, China

<sup>d</sup> Tianjin Cardiovascular Diseases Institute, Tianjin, 300222, China

<sup>‡</sup> Equal contribution

\* Corresponding author: [leftcure@163.com](mailto:leftcure@163.com) (Tongyun Chen), [zhaofeng7815@163.com](mailto:zhaofeng7815@163.com) (Feng Zhao), [zhiganguo\\_2023@163.com](mailto:zhiganguo_2023@163.com) (Zhigang Guo)

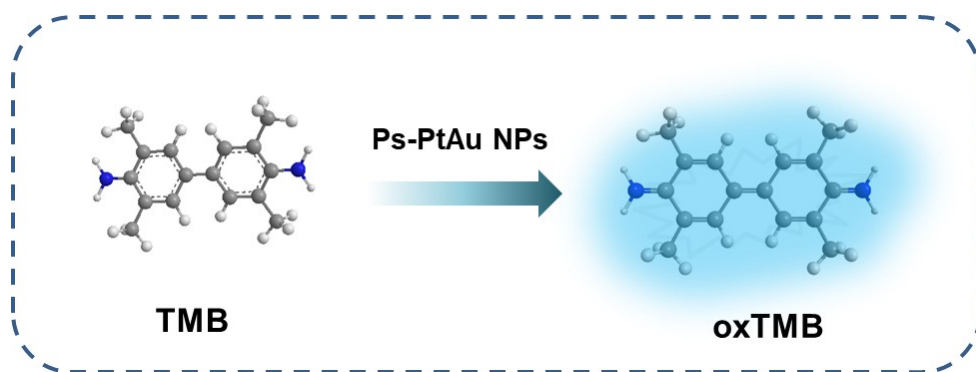

**Fig. S1.** The oxidation procedure of TMB with Ps-PtAu NPs.

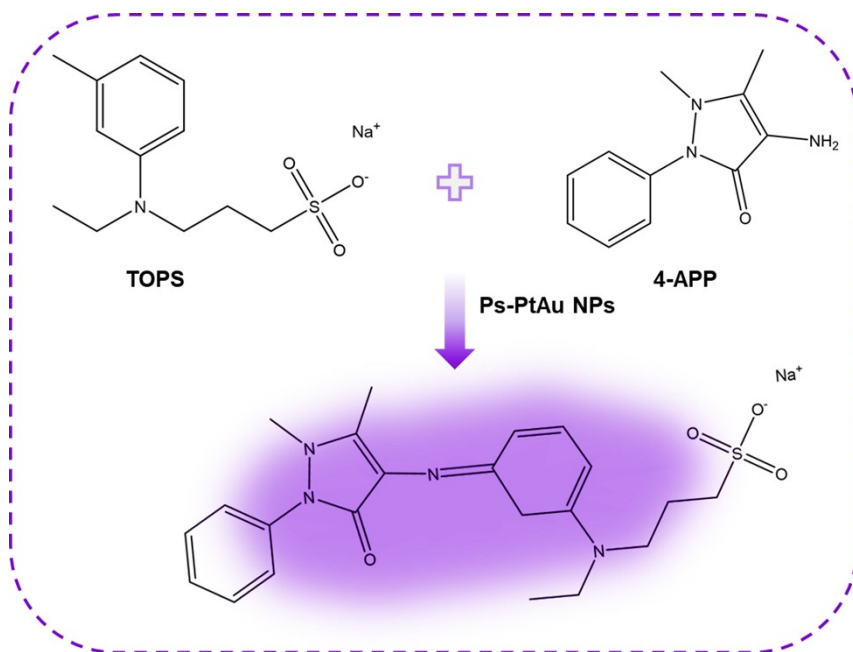

**Fig. S2.** The oxidation procedure of 4-AAP and TOPS with Ps-PtAu NPs.

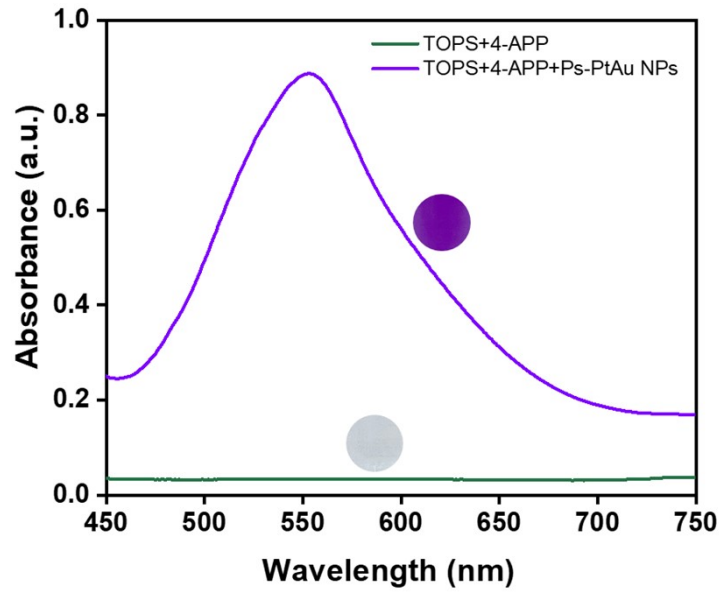

**Fig. S3.** The UV-vis absorbance spectra of TOPS + 4-AAP and TOPS + 4-AAP with Ps-PtAu NPs

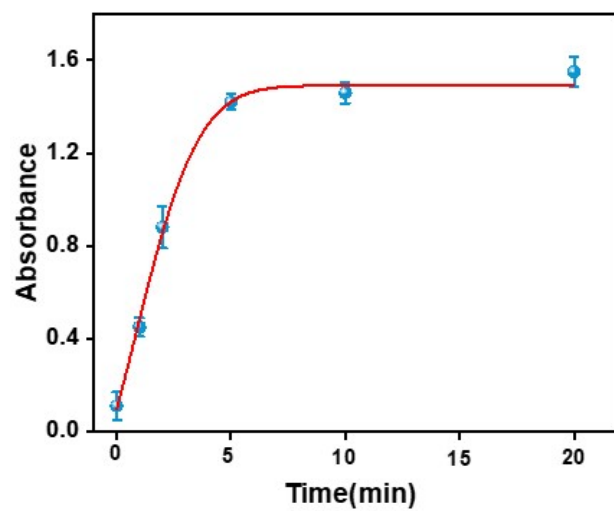

**Fig. S4.** The absorbance intensity of TMB at 651 nm with different reaction times.

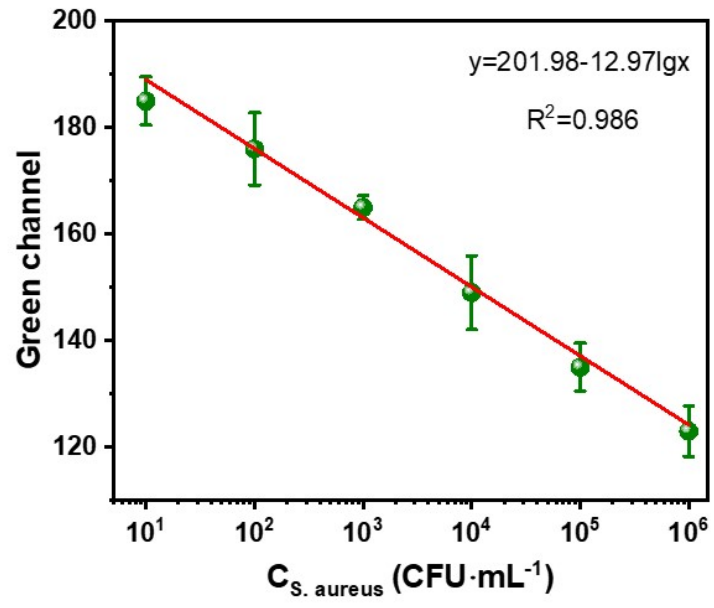

Fig. S5. The linear relationship between the *S. aureus* concentration and the green channel.

**Table S1.** Comparison the as-prepared strategy and previous research for the detection of *S. aureus*

| <b>Bacteria</b>  | <b>Methods</b>  | <b>Detection range<br/>(CFU/mL)</b> | <b>LOD<br/>(CFU/mL)</b> | <b>Reference</b> |
|------------------|-----------------|-------------------------------------|-------------------------|------------------|
| <i>S. aureus</i> | Temperature     | $10^2$ - $10^6$                     | 6.0                     | [1]              |
| <i>S. aureus</i> | SERS            | $10^1$ - $10^7$                     | —                       | [2]              |
| <i>S. aureus</i> | Electrochemical | $1 \times 10^3$ - $1 \times 10^9$   | $3.1 \times 10^2$       | [3]              |
| <i>S. aureus</i> | SERS            | $10^1$ - $10^7$                     | 3                       | [4]              |
| <i>S. aureus</i> | Fluorescence    | $10^2$ - $10^5$                     | $2.7 \times 10^2$       | [5]              |
| <i>S. aureus</i> | Fluorescence    | $10^1$ - $10^6$                     | 6.9                     | [6]              |
| <i>S. aureus</i> | Colorimetric    | $3 \times 10^2$ - $3 \times 10^8$   | $1.2 \times 10^2$       | [7]              |
| <i>S. aureus</i> | Smartphone      | $10^1$ - $10^6$                     | 1.0                     | This work        |

$$\text{LOD} = 3\sigma/s$$

Here,  $\sigma$  is the deviation from the blank value;  $s$  is the slope of the standard curve.



## References

1. Lin X, Ibarlucea B, Peng T, et al. Two birds with one stone: A multifunctional nanoplatform for photothermal sensitive detection and real-time inactivation of *Staphylococcus aureus* with NIR responsive  $\text{Cu}_{2-x}\text{Se}@\text{Van}$  NPs. *Sensors and Actuators B: Chemical*, 2023, 381,133475.
2. Gao X, Yin Y, Wu H, et al. Integrated SERS platform for reliable detection and photothermal elimination of bacteria in whole blood samples. *Analytical Chemistry*, 2020, 93, 3, 1569-1577.
3. Yue H, Zhou Y, Wang P, et al. A facile label-free electrochemiluminescent biosensor for specific detection of *Staphylococcus aureus* utilizing the binding between immunoglobulin G and protein A. *Talanta*, 2016, 153, 401-406.
4. Xie B, Wang Z P, Zhang R, et al. A SERS aptasensor based on porous Au-NC nanoballoons for *Staphylococcus aureus* detection. *Analytica Chimica Acta*, 2022, 1190, 339175.
5. Wang Z, Feng X, Xiao F, et al. A novel PEG-mediated boric acid functionalized magnetic nanomaterials based fluorescence biosensor for the detection of *Staphylococcus aureus*. *Microchemical Journal*, 2022, 178, 107379.
6. Guo Y, Zheng Y, Liu Y, et al. A concise detection strategy of *Staphylococcus aureus* using N-Succinyl-Chitosan-dopped bacteria-imprinted composite film and AIE fluorescence sensor. *Journal of Hazardous Materials*, 2022, 423, 126934.
7. Zhou W, Wen H, Hao G, et al. Surface engineering of magnetic peroxidase mimic using bacteriophage for high-sensitivity/specificity colorimetric determination of *Staphylococcus aureus* in food. *Food Chemistry*, 2023, 136611.
